# Supplementary material
Source: PubMed Central journal article supplement (PMC520805)
Supplement: plntphys_135_4_2379__1.pdf [file plntphys_135_4_2379__1.pdf]

**Supplementary Table 1.** *Primer sets used for the amplification of the genes of tetrapyrrole biosynthesis in Arabidopsis*

| Gene              | Forward primer                    | Reverse primer                      | Product size (bp) |
|-------------------|-----------------------------------|-------------------------------------|-------------------|
| HEMA1             | 5'-GGCAATGGCGGAACAACAACATAAG-3'   | 5'-CAGACCCCAATTCCATGAACCAAAG-3'     | 361               |
| HEMA2             | 5'-GAGAGAAGAGAGCCTTTGTTTCATC-3'   | 5'-GGCTTTATTTCTCAACCAAACATCAC-3'    | 366               |
| HEMA3             | 5'-CGACGGAGAGTTACTCGAGGAGAAG-3'   | 5'-CCTCTCGCTAACAAAAATGAAAAACCC-3'   | 211               |
| GSA1              | 5'-AGTTAACAATTGCTGCGGCTGAGAG-3'   | 5'-CTCATTCAAAAACATTGCTGCGATATG-3'   | 365               |
| GSA2              | 5'-GCGGGATGTTCCGTTTCTTCTTCAC-3'   | 5'-GTGAGATTGCTTGCTTGCTCTCAATTG-3'   | 320               |
| ALAD1             | 5'-GGCTACTACACCCATCTTTAATGC-3'    | 5'-GGCTTAATTATCGGTGTCCCAACC-3'      | 300               |
| ALAD2             | 5'-GGCATTGCTAGAAACACGAGAAG-3'     | 5'-CGCCGCATAATTTGTAGCAGCTTG-3'      | 287               |
| PBGD              | 5'-CCTCTAGCACTTGTCTAAGCATAAG-3'   | 5'-CGTGGCTGCAGTTAGACAAATAAACGC-3'   | 318               |
| UROS              | 5'-CCGGTGCAGAGTGTGATACGGTG-3'     | 5'-CCTGCTGCTAGGGTACTTGAATC-3'       | 281               |
| URO1              | 5'-GCTAGTGGATCAGGAGRRRGCTAGA-3'   | 5'-CTAATTTCTTGAGCAACCTCAAAGAAG-3'   | 299               |
| URO2              | 5'-GTTGTGAAGTGTGCTGGACAAAAGG-3'   | 5'-CATCGATTAAGGGTCAGACATGGAAC-3'    | 305               |
| UPM1              | 5'-GCTCTGTTCAGCGGATTCCAATTC-3'    | 5'-CATCTCTGGTCCACAATCACCACC-3'      | 346               |
| CPO1              | 5'-AGCCTGTGTTTCCCATTTGTGTAG-3'    | 5'-GCAAGAAACCAACTGTTTGCATTGG-3'     | 251               |
| CPO2              | 5'-GCAAGCCTGCGATAAAATTTGATCCG-3'  | 5'-TGTTCCGCGGTCATACACGAAGTTG-3'     | 307               |
| CPO3              | 5'-CTGGTGTGGAAATGGTGTATGTTGATC-3' | 5'-GGAGCTACCACGCCAAACGATAGAG-3'     | 342               |
| PPO1              | 5'-CCCCTGTATGACAGCAGCTATGAC-3'    | 5'-CGCACGGCGGCTTGTGTCATTTTAC-3'     | 274               |
| PPO2              | 5'-TCCGACGACTCAATCGCTTCTCCG-3'    | 5'-TGCTCCAACACGATCCTTAGCCTC-3'      | 272               |
| FC1               | 5'-CACCGACTTAGCTGATGCAGTGATAG-3'  | 5'-CCCACATCAGCTTATTAGAGCTGGTG-3'    | 311               |
| FC2               | 5'-GGTGTATGGCTGTCTCAAACCTTG-3'    | 5'-GCTGGCCTTATCCACATGTGAAAGC-3'     | 342               |
| HO1               | 5'-TCCCTCTTCTCTAATCTTCAAGCCAAC-3' | 5'-GACGGCGACTTGTTTCATGGTCATAC-3'    | 231               |
| HO2               | 5'-TGTCGTCGGAATCCATGGCTTCTC-3'    | 5'-GCGTAATCTCATGGCGACGAATCTC-3'     | 279               |
| HO3               | 5'-AGGGTTCGGGCATAACTAATCTCC-3'    | 5'-CAAAAGCTTGATGCTTACACTTCTTCATG-3' | 216               |
| HO4               | 5'-GTCTAGTCAACGGCTTACGACAAAGAC-3' | 5'-CACCACAAAGTCTGATCTTCGTTTGC-3'    | 282               |
| HY2               | 5'-CCACCTGTTCTAATCTCTGCAAGC-3'    | 5'-ATGGGAGTATCATACTCAGGCTCC-3'      | 329               |
| ChlI              | 5'-GTTCTAGTTTCCGAGAAGTTCGCCG-3'   | 5'-GATAGCTTTATAGCCATAATCAATGCAGG-3' | 264               |
| ChlII             | 5'-GGAGTCTATGGATTCGGGAATTCTCG-3'  | 5'-GGCACTCACTGCTGGTATTCTGATC-3'     | 260               |
| ChIH              | 5'-GGTGATCCCATCAGAAACCCAAAGG-3'   | 5'-CACCAATCATCCAAAGAACCTGCC-3'      | 244               |
| ChID              | 5'-GGGTCTGTTGATGTTGAGGAGTCTG-3'   | 5'-GCAACACGGTCTAGCAAGTGTCTC-3'      | 272               |
| ChIM              | 5'-AGCCGGGTGACAGTACAACAATC-3'     | 5'-ACCGCCAAGGATCTATCTTCAGTC-3'      | 298               |
| CRD1              | 5'-ATGGCGTTAGTAAACCCATCTCC-3'     | 5'-AAGATCTGTCGGAGAGGTCCTTGC-3'      | 383               |
| PORA <sup>a</sup> | 5'-GGGAATTCATTTCACTTTCCGAGCA-3'   | 5'-GGGTCGACGCGTCTAAGGAAGATT-3'      | 137               |
| PORB <sup>a</sup> | 5'-GGGAATTCGCTCCATTACCGACCA-3'    | 5'-GGGTCGACGCGTCCACGGATTTG-3'       | 140               |
| PORC              | 5'-GAAGACAGAAACCGCGATTTCCAC-3'    | 5'-ATCTTCTTGACATTCCAACAGATCTC-3'    | 257               |
| ChIG              | 5'-TGACTTCGATTTCAACACTGTCTC-3'    | 5'-AGGCCAAGTACTGGTTTTGTAAAGC-3'     | 329               |
| CAO               | 5'-CCCTCTTCAACCACTGCTTCTG-3'      | 5'-GTCCCTCGTTCACTGTGCCAAGATC-3'     | 292               |

<sup>a</sup> Primer design is based on Armstrong *et al.* (1995).
