# Supplementary material
Source: PubMed Central journal article supplement (PMC520805)
Supplement: plntphys_135_4_2379__2.pdf [file plntphys_135_4_2379__2.pdf]

Col 1 1 1 1 2 2 2 2 3 3 3 3 4 4 4 4 5 5 5 5  
 Row 1 2 3 4 1 2 3 4 1 2 3 4 1 2 3 4 1 2 3 4

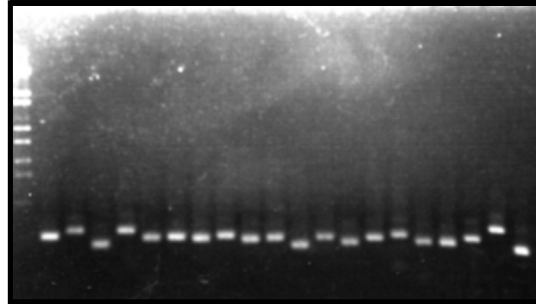

Col 6 6 6 6 7 7 7 7 8 8 8 8 9 9 9 9 10 10 10 10  
 Row 1 2 3 4 1 2 3 4 1 2 3 4 1 2 3 4 1 2 3 4

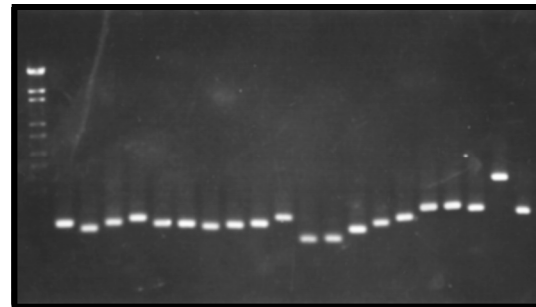

Col 11 11 11 11 12 12 12  
 Row 1 2 3 4 1 2 3

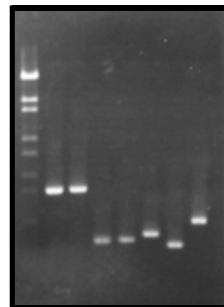

**Supplemental Figure 1.** Gel images of PCR-amplified probes. PCR amplification was carried out with each clone (Col and Row correspond to Table 1) as a template. Resultant probes were subjected to agarose electrophoresis after purification.
