# Supplementary material
Source: PubMed Central journal article supplement (PMC520805)
Supplement: plntphys_135_4_2379__3.pdf [file plntphys_135_4_2379__3.pdf]

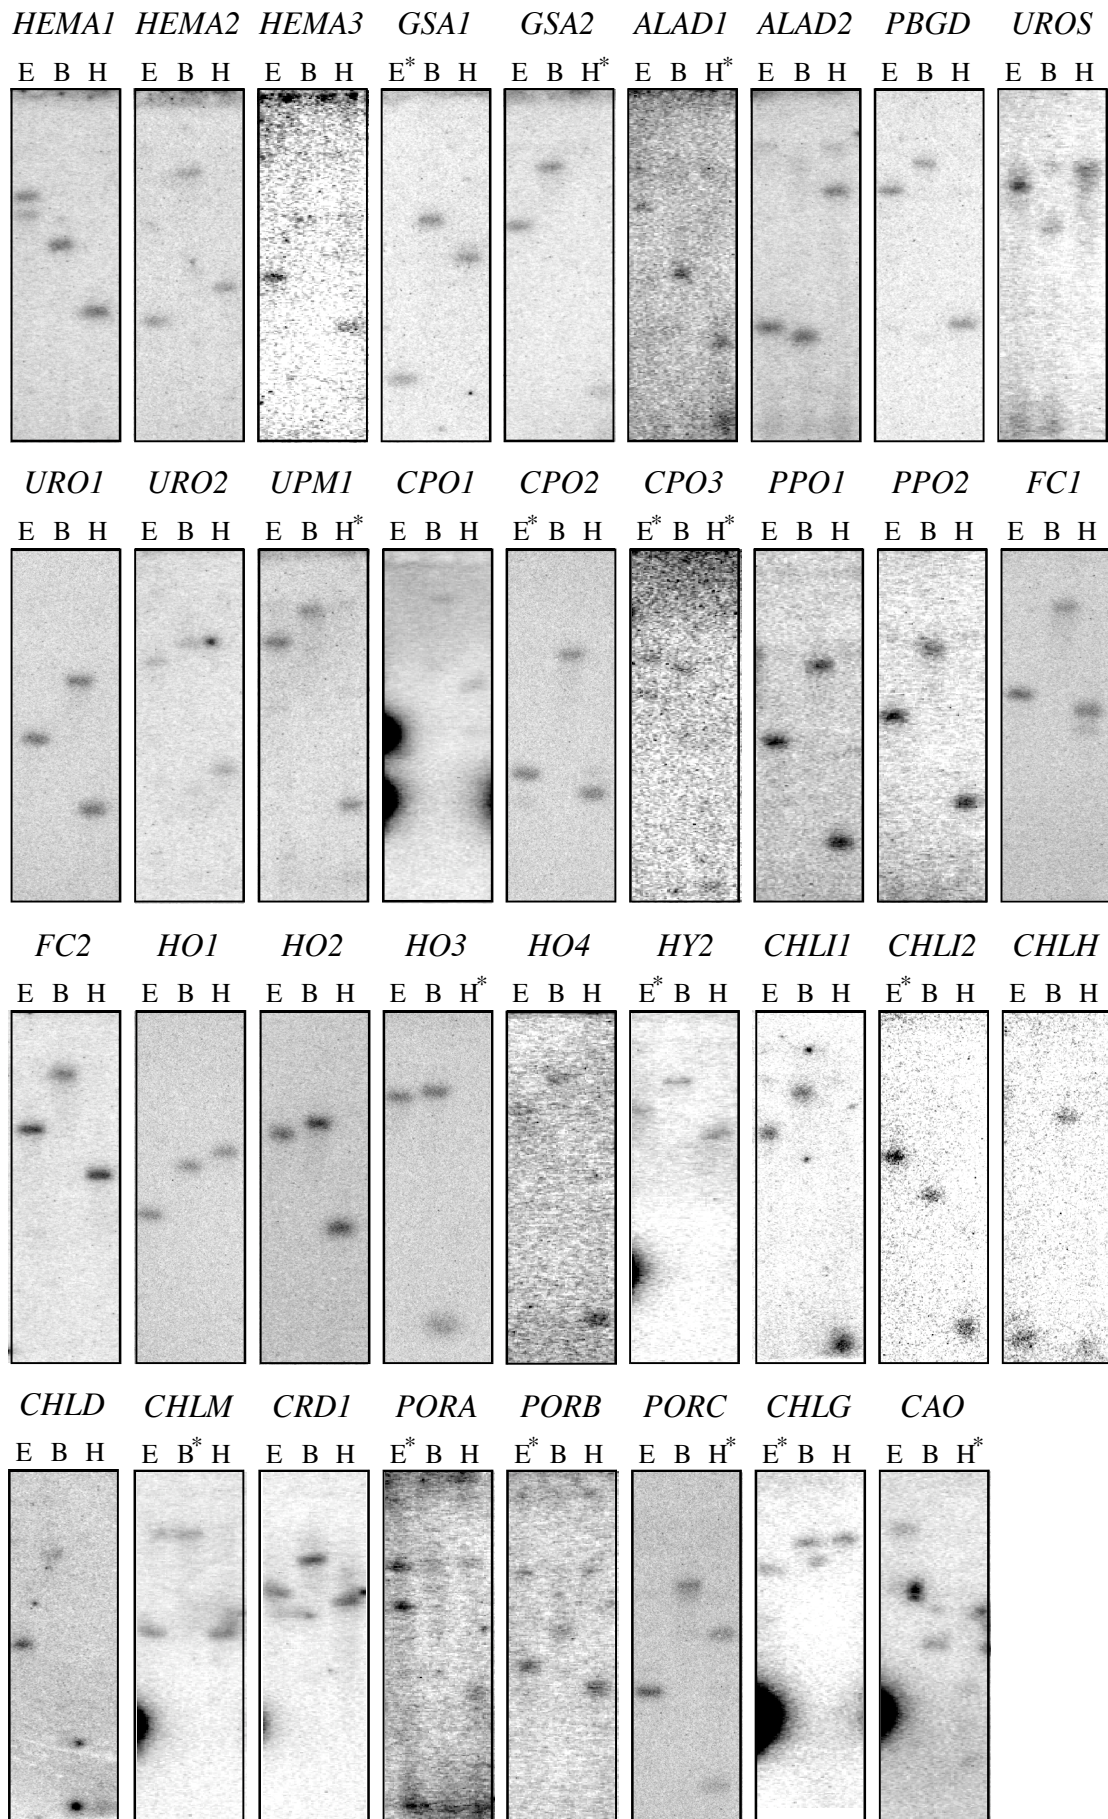

**Supplemental Figure 2.** Confirmation of the specificity of the DNA probes by genomic Southern analysis. Genomic DNA (3  $\mu$ g) of *Arabidopsis* was digested *Eco*RI (E), *Bam*HI (B) or *Hind*III (H), separated on agarose gel, transferred onto nylon membrane, and hybridized with  $^{32}$ P-labeled probes. Asterisk (\*) is shown when restriction site is found in the internal sequence of the probe.
