# Supplementary material
Source: PubMed Central journal article supplement (PMC520805)
Supplement: plntphys_135_4_2379__4.pdf [file plntphys_135_4_2379__4.pdf]

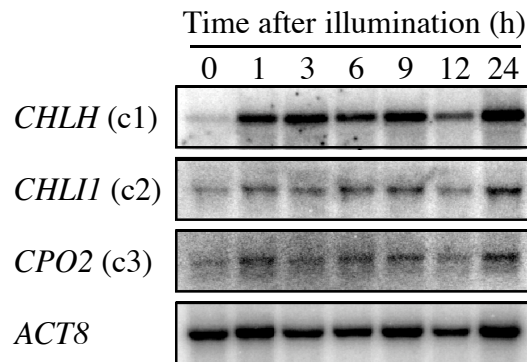

**Supplemental Figure 3.** Confirmation of gene expression profiles by Northern blot analysis. Genes representative in clusters 1 to 3 were hybridized with RNA samples (at the onset of greening) used for mini-array analysis. Profiles of each gene are basically consistent with those presented by the mini-array analysis (Figure 2). The profile of *ACT8* shows house-keeping expression of this gene.
